# Supplementary material for: Text mining for identifying topics in the literatures about adolescent substance use and depression
Source: PubMed Central journal article supplement (PMC4799597; doi:10.1186/s12889-016-2932-1), 2016-03-19
Supplement: 12889_2016_2932_MOESM1_ESM.pdf [file 12889_2016_2932_MOESM1_ESM.pdf]

topic p The most 10 probable words

|   |      |            |           |              |           |           |           |          |            |            |               |
|---|------|------------|-----------|--------------|-----------|-----------|-----------|----------|------------|------------|---------------|
| 0 | 0.07 | alcohol    | ethanol   | exposure     | brain     | rats      | nicotine  | adult    | age        | levels     | response      |
| 1 | 0.10 | treatment  | health    | intervention | care      | substance | patients  | children | depression | based      | interventions |
| 2 | 0.15 | depression | symptoms  | depressive   | disorder  | anxiety   | disorders | children | years      | age        | psychiatric   |
| 3 | 0.11 | alcohol    | substance | sexual       | behaviors | behavior  | family    | drinking | age        | youth      | problems      |
| 4 | 0.14 | smoking    | tobacco   | alcohol      | students  | school    | health    | ci       | years      | prevalence | age           |

p: cumulative probability of the most 10 probable words
