# Supplementary material for: Text mining for identifying topics in the literatures about adolescent substance use and depression
Source: PubMed Central journal article supplement (PMC4799597; doi:10.1186/s12889-016-2932-1), 2016-03-19
Supplement: 12889_2016_2932_MOESM3_ESM.pdf [file 12889_2016_2932_MOESM3_ESM.pdf]

topic p The most 10 probable words

|    |      |              |            |               |               |                |                 |                |                |               |             |
|----|------|--------------|------------|---------------|---------------|----------------|-----------------|----------------|----------------|---------------|-------------|
| 0  | 0.25 | family       | substance  | parental      | behaviors     | behavior       | protective      | parenting      | youth          | parents       | monitoring  |
| 1  | 0.53 | smoking      | tobacco    | smokers       | cigarette     | cessation      | smoke           | cigarettes     | nicotine       | smoked        | current     |
| 2  | 0.15 | trials       | review     | interventions | search        | included       | analysis        | quality        | articles       | literature    | criteria    |
| 3  | 0.22 | gene         | genetic    | allele        | genotype      | hitlpr         | interaction     | polymorphism   | rs             | genes         | environment |
| 4  | 0.18 | treatment    | placebo    | scale         | weeks         | depression     | children        | patients       | week           | clinical      | response    |
| 5  | 0.29 | internet     | gambling   | addiction     | caffeine      | music          | video           | online         | energy         | problem       | media       |
| 6  | 0.41 | depression   | depressed  | mdd           | depressive    | major          | mood            | disorder       | group          | clinical      | onset       |
| 7  | 0.48 | symptoms     | depression | depressive    | anxiety       | levels         | girls           | relationship   | high           | boys          | higher      |
| 8  | 0.23 | intervention | program    | group         | control       | based          | prevention      | trial          | participants   | follow        | school      |
| 9  | 0.26 | stress       | depression | coping        | life          | events         | cognitive       | psychological  | emotional      | distress      | attachment  |
| 10 | 0.51 | substance    | drug       | marijuana     | alcohol       | cannabis       | drugs           | users          | abuse          | substances    | illicit     |
| 11 | 0.22 | care         | screening  | health        | primary       | patients       | medical         | depression     | counseling     | adherence     | pediatric   |
| 12 | 0.21 | ethanol      | rats       | exposure      | adult         | alcohol        | mice            | kg             | days           | animals       | etoh        |
| 13 | 0.41 | children     | problems   | parents       | child         | family         | parent          | parental       | mothers        | maternal      | families    |
| 14 | 0.11 | brain        | expression | long          | exposure      | receptor       | term            | cell           | cortex         | cells         | hippocampal |
| 15 | 0.21 | sleep        | memory     | cognitive     | performance   | insomnia       | task            | functioning    | attention      | deficits      | verbal      |
| 16 | 0.23 | treatment    | depression | children      | medication    | patients       | antidepressants | therapy        | antidepressant | medications   | efficacy    |
| 17 | 0.17 | patients     | years      | age           | injury        | hospital       | cases           | ed             | injuries       | group         | emergency   |
| 18 | 0.31 | disorders    | disorder   | psychiatric   | anxiety       | children       | diagnostic      | mental         | dsm            | clinical      | diagnosis   |
| 19 | 0.27 | violence     | abuse      | victimization | sexual        | physical       | aggression      | substance      | maltreatment   | dating        | violent     |
| 20 | 0.25 | eating       | diabetes   | body          | depression    | acne           | weight          | control        | patients       | qol           | nervosa     |
| 21 | 0.10 | research     | prevention | based         | interventions | youth          | development     | review         | article        | literature    | important   |
| 22 | 0.24 | treatment    | substance  | therapy       | cbt           | follow         | outcomes        | abuse          | change         | family        | behavioral  |
| 23 | 0.14 | genetic      | behavior   | environmental | personality   | latent         | class           | trajectories   | growth         | high          | differences |
| 24 | 0.27 | age          | years      | early         | young         | onset          | adulthood       | time           | longitudinal   | adult         | follow      |
| 25 | 0.51 | suicidal     | suicide    | ideation      | attempts      | depression     | behavior        | harm           | suicidality    | attempt       | thoughts    |
| 26 | 0.12 | patients     | disease    | blood         | heart         | cardiovascular | pressure        | children       | hypertension   | adults        | syndrome    |
| 27 | 0.22 | ci           | odds       | regression    | logistic      | survey         | ratio           | prevalence     | analyses       | adjusted      | past        |
| 28 | 0.42 | adhd         | disorder   | sub           | bipolar       | hyperactivity  | attention       | deficit        | cd             | conduct       | disorders   |
| 29 | 0.27 | american     | youth      | african       | ethnic        | hispanic       | white           | differences    | substance      | groups        | black       |
| 30 | 0.33 | ptsd         | stress     | trauma        | traumatic     | symptoms       | exposure        | posttraumatic  | children       | depression    | disorder    |
| 31 | 0.26 | girls        | boys       | behaviour     | age           | health         | years           | gender         | school         | differences   | prevalence  |
| 32 | 0.12 | intake       | bone       | levels        | serum         | diet           | dietary         | concentrations | age            | women         | breast      |
| 33 | 0.32 | physical     | weight     | activity      | body          | obesity        | health          | overweight     | bmi            | behaviors     | exercise    |
| 34 | 0.26 | exposure     | asthma     | children      | smoke         | tobacco        | ets             | cancer         | cotinine       | environmental | exposed     |
| 35 | 0.23 | tobacco      | exposure   | smoking       | media         | advertising    | youth           | cigarettes     | products       | control       | cigarette   |
| 36 | 0.41 | health       | mental     | problems      | services      | care           | youth           | service        | outcomes       | physical      | young       |
| 37 | 0.58 | alcohol      | drinking   | consumption   | related       | problems       | age             | drink          | expectancies   | frequency     | motives     |
| 38 | 0.21 | social       | peer       | perceived     | school        | friends        | support         | influence      | variables      | model         | peers       |
| 39 | 0.21 | pain         | depression | anxiety       | children      | patients       | group           | scores         | chronic        | life          | quality     |
| 40 | 0.40 | dependence   | alcohol    | abuse         | substance     | disorders      | and             | dsm            | criteria       | iv            | drug        |
| 41 | 0.24 | school       | students   | high          | prevalence    | schools        | survey          | health         | questionnaire  | males         | cross       |
| 42 | 0.13 | brain        | functional | matter        | imaging       | regions        | magnetic        | activation     | resonance      | left          | cortex      |
| 43 | 0.12 | young        | people     | parents       | social        | attitudes      | participants    | group          | knowledge      | groups        | adults      |
| 44 | 0.46 | drinking     | alcohol    | binge         | heavy         | driving        | drinkers        | college        | related        | behaviors     | high        |
| 45 | 0.16 | scale        | factor     | validity      | scores        | items          | analysis        | reliability    | measure        | version       | item        |
| 46 | 0.33 | sexual       | hiv        | sex           | behaviors     | behavior       | intercourse     | partners       | sexually       | risky         | condom      |
| 47 | 0.34 | pregnancy    | exposure   | maternal      | prenatal      | mothers        | women           | birth          | pregnant       | offspring     | exposed     |
| 48 | 0.18 | nicotine     | stress     | cortisol      | levels        | rats           | day             | lpa            | response       | axis          | mg          |
| 49 | 0.12 | development  | behavior   | early         | behavioral    | brain          | developmental   | reward         | cognitive      | affect        | pubertal    |

p: cumulative probability of the most 10 probable words
