# Supplementary material for: Text mining for identifying topics in the literatures about adolescent substance use and depression
Source: Springer Nature journal article supplement (doi:10.1186/s12889-016-2932-1), 2016-03-19
Supplement: MOESM2 [file 9751666]

topic p The most 10 probable words

|    |      |              |            |             |            |               |            |              |               |               |            |
|----|------|--------------|------------|-------------|------------|---------------|------------|--------------|---------------|---------------|------------|
| 0  | 0.35 | substance    | drug       | abuse       | alcohol    | marijuana     | cannabis   | users        | drugs         | dependence    | substances |
| 1  | 0.17 | school       | students   | health      | ci         | prevalence    | girls      | boys         | age           | years         | high       |
| 2  | 0.08 | asthma       | children   | disease     | levels     | blood         | years      | patients     | age           | serum         | exposure   |
| 3  | 0.22 | disorders    | disorder   | psychiatric | adhd       | sleep         | depression | anxiety      | children      | symptoms      | clinical   |
| 4  | 0.17 | treatment    | depression | children    | trials     | patients      | therapy    | medication   | placebo       | clinical      | controlled |
| 5  | 0.17 | patients     | pain       | depression  | children   | anxiety       | life       | group        | psychological | chronic       | years      |
| 6  | 0.08 | research     | health     | review      | prevention | interventions | social     | young        | based         | development   | people     |
| 7  | 0.23 | sexual       | behaviors  | violence    | sex        | hiv           | behavior   | health       | abuse         | victimization | youth      |
| 8  | 0.29 | children     | child      | problems    | parents    | family        | mothers    | maternal     | parental      | parent        | offspring  |
| 9  | 0.32 | depression   | symptoms   | depressive  | anxiety    | stress        | girls      | levels       | depressed     | coping        | social     |
| 10 | 0.42 | alcohol      | drinking   | consumption | related    | binge         | heavy      | age          | drinkers      | drink         | frequency  |
| 11 | 0.32 | smoking      | tobacco    | smokers     | cigarette  | exposure      | smoke      | cigarettes   | current       | cessation     | nicotine   |
| 12 | 0.18 | intervention | treatment  | program     | group      | based         | follow     | participants | control       | interventions | months     |
| 13 | 0.19 | weight       | american   | physical    | eating     | body          | ethnic     | health       | activity      | obesity       | girls      |
| 14 | 0.13 | scale        | factor     | scores      | validity   | depression    | analysis   | items        | test          | reliability   | version    |
| 15 | 0.22 | health       | care       | mental      | services   | treatment     | patients   | screening    | primary       | medical       | problems   |
| 16 | 0.25 | suicide      | suicidal   | ideation    | ptsd       | attempts      | depression | trauma       | injury        | behavior      | harm       |
| 17 | 0.15 | age          | early      | adulthood   | years      | longitudinal  | young      | time         | onset         | genetic       | adult      |
| 18 | 0.09 | ethanol      | brain      | rats        | exposure   | adult         | nicotine   | response     | memory        | stress        | mice       |
| 19 | 0.16 | peer         | social     | family      | substance  | school        | parental   | behavior     | behaviors     | youth         | perceived  |

p: cumulative probability of the most 10 probable words
